# Supplementary material for: Ocular Pharmacokinetics of a Novel Loteprednol Etabonate 0.4% Ophthalmic Formulation
Source: Springer Nature journal article supplement (doi:10.1007/s40123-014-0021-z), 2014-02-03
Supplement: MOESM1 [file 9339972]

- This study supports the premise that mucus penetrating particle (MPP) technology can be used to enhance ocular exposure for topically applied therapeutics.
- Conventional attempts to improve retention at the ocular surface have focused on increased viscosity of formulations; the MPP technology is used to create novel formulations that circumvent the tear mucin clearance mechanism.
- In rabbit pharmacokinetic studies, the novel loteprednol etabonate (LE-MPP) 0.4% formulation resulted in approximately 3-fold higher peak concentrations in aqueous humor and ocular tissues compared to the commercial formulation of Lotemax® 0.5% suspension (Bausch & Lomb Incorporated, Inc., Rochester, NY, USA).
- Further studies to assess the efficacy and safety of the LE-MPP formulation for clinical applications are warranted.

This summary slide represents the opinions of the authors. Sponsorship for this study was funded by Kala Pharmaceuticals, Inc. For a full list of acknowledgments and conflicts of interest for all authors of this article, please see the full text online. Copyright © The Authors 2014. Creative Commons Attribution Noncommercial License (CC BY-NC).
